# Supplementary material for: Spherical Body Protein 4 from Babesia bigemina: A Novel Gene That Contains Conserved B-Cell Epitopes and Induces Cross-Reactive Neutralizing Antibodies in Babesia ovata
Source: Pathogens. 2023 Mar 22;12(3):495. doi: 10.3390/pathogens12030495 (PMC10051436; doi:10.3390/pathogens12030495)
Supplement: Supplementary file 1 [file pathogens-12-00495-s001.zip › pathogens-2261427-supplementary.pdf]

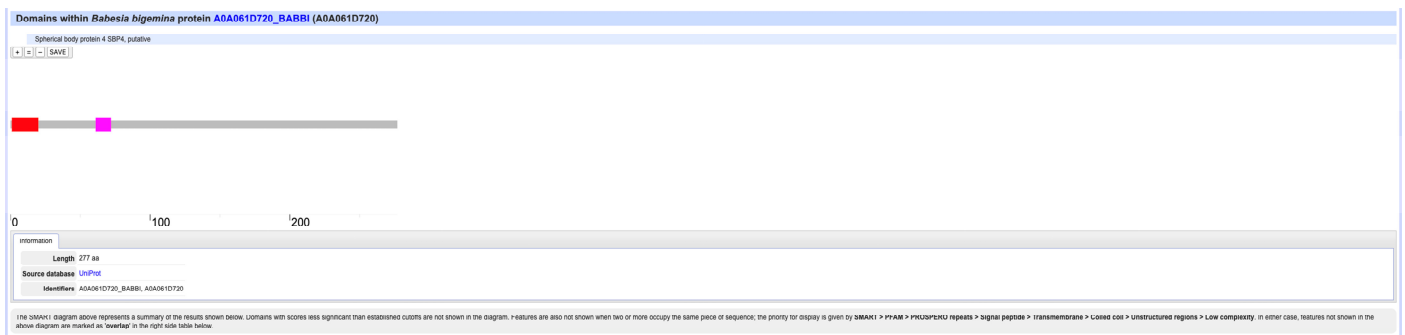

**Figure S3.** Domain and signal peptide identification by SMART.

### TMHMM result

```
# XP_012767973.1 Length: 277
# XP_012767973.1 Number of predicted TMHs: 0
# XP_012767973.1 Exp number of AAs in TMHs: 3.53112
# XP_012767973.1 Exp number, first 60 AAs: 3.49966
# XP_012767973.1 Total prob of N-in: 0.17618
XP_012767973.1 TMHMM2.0      outside      1 277
```

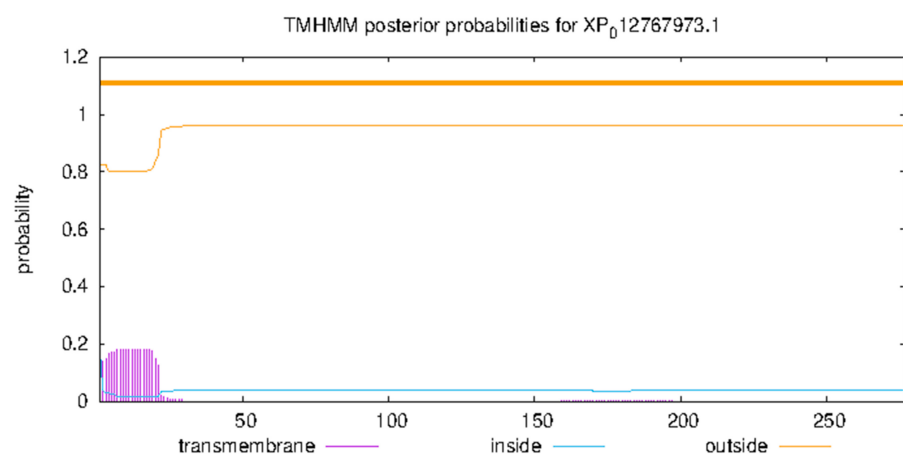

**Figure S4.** Transmembrane domain identification.
